# Supplementary material for: Interrelation between Plasma Concentrations of Vitamins C and E along the Trajectory of Ageing in Consideration of Lifestyle and Body Composition: A Longitudinal Study over Two Decades
Source: PubMed Central journal article supplement (PMC7599873; doi:10.3390/nu12102944), 2020-09-25
Supplement: nutrients-12-02944-s001.pdf [file nutrients-12-02944-s001.pdf]

**Supplementary Table 1.** Results of linear mixed-effects models for determinants of vitamin C plasma concentrations after excluding model-specific outliers <sup>a,b</sup>.

|                                         | Model 2 ( <i>n</i> = 396, 2762 records) |                                                  | Model 3 ( <i>n</i> = 396, 2766 records) |                                                  | Model 4 ( <i>n</i> = 297, 1804 records) |                                                  | Model 5 ( <i>n</i> = 226, 1990 records) |                                                  |
|-----------------------------------------|-----------------------------------------|--------------------------------------------------|-----------------------------------------|--------------------------------------------------|-----------------------------------------|--------------------------------------------------|-----------------------------------------|--------------------------------------------------|
|                                         | CE                                      | [95% CI]                                         | CE                                      | [95% CI]                                         | CE                                      | [95% CI]                                         | CE                                      | [95% CI]                                         |
| Intercept                               | 7.5×10 <sup>+1</sup> ***                | [7.3×10 <sup>+1</sup> , 7.8×10 <sup>+1</sup> ]   | 7.5×10 <sup>+1</sup> ***                | [7.2×10 <sup>+1</sup> , 7.7×10 <sup>+1</sup> ]   | 7.5×10 <sup>+1</sup> ***                | [7.3×10 <sup>+1</sup> , 7.8×10 <sup>+1</sup> ]   | 7.5×10 <sup>+1</sup> ***                | [7.2×10 <sup>+1</sup> , 7.9×10 <sup>+1</sup> ]   |
| Age (years)                             | -1.3×10 <sup>-2</sup>                   | [-1.2×10 <sup>-1</sup> , 9.4×10 <sup>-2</sup> ]  | -3.9×10 <sup>-2</sup>                   | [-1.7×10 <sup>-1</sup> , 9.5×10 <sup>-2</sup> ]  | -1.0×10 <sup>-2</sup>                   | [-1.4×10 <sup>-1</sup> , 1.2×10 <sup>-1</sup> ]  | 6.0×10 <sup>-3</sup>                    | [-1.1×10 <sup>-1</sup> , 1.2×10 <sup>-1</sup> ]  |
| Age <sup>2</sup> (years)                | 2.2×10 <sup>-3</sup>                    | [-7.7×10 <sup>-3</sup> , 1.2×10 <sup>-2</sup> ]  | 2.0×10 <sup>-3</sup>                    | [-7.9×10 <sup>-3</sup> , 1.2×10 <sup>-2</sup> ]  | -4.0×10 <sup>-3</sup>                   | [-1.6×10 <sup>-2</sup> , 8.4×10 <sup>-3</sup> ]  | 4.2×10 <sup>-3</sup>                    | [-6.6×10 <sup>-3</sup> , 1.5×10 <sup>-2</sup> ]  |
| Male sex                                | -4.3×10 <sup>-1</sup>                   | [-5.0×10 <sup>+0</sup> , 4.1×10 <sup>+0</sup> ]  | -4.9×10 <sup>+0</sup>                   | [-1.1×10 <sup>+1</sup> , 7.3×10 <sup>-1</sup> ]  | -2.0×10 <sup>+0</sup>                   | [-6.9×10 <sup>+0</sup> , 3.0×10 <sup>+0</sup> ]  | -5.5×10 <sup>-1</sup>                   | [-6.1×10 <sup>+0</sup> , 5.0×10 <sup>+0</sup> ]  |
| FFM (kg)                                | -4.7×10 <sup>-1</sup> ***               | [-6.9×10 <sup>-1</sup> , -2.4×10 <sup>-1</sup> ] | -6.8×10 <sup>-1</sup> ***               | [-9.6×10 <sup>-1</sup> , -4.0×10 <sup>-1</sup> ] | -3.8×10 <sup>-1</sup> *                 | [-6.4×10 <sup>-1</sup> , -1.3×10 <sup>-1</sup> ] | -4.6×10 <sup>-1</sup> **                | [-7.2×10 <sup>-1</sup> , -2.0×10 <sup>-1</sup> ] |
| Current/past smoking                    | -3.0×10 <sup>+0</sup>                   | [-5.7×10 <sup>+0</sup> , -2.0×10 <sup>-1</sup> ] | -3.4×10 <sup>+0</sup>                   | [-6.2×10 <sup>+0</sup> , -6.0×10 <sup>-1</sup> ] | -2.3×10 <sup>+0</sup>                   | [-5.2×10 <sup>+0</sup> , 6.3×10 <sup>-1</sup> ]  | -1.9×10 <sup>+0</sup>                   | [-5.4×10 <sup>+0</sup> , 1.5×10 <sup>+0</sup> ]  |
| PAI                                     | 6.0×10 <sup>+0</sup> *                  | [2.4×10 <sup>+0</sup> , 9.6×10 <sup>+0</sup> ]   | 6.4×10 <sup>+0</sup> **                 | [2.8×10 <sup>+0</sup> , 1.0×10 <sup>+1</sup> ]   | 9.9×10 <sup>+0</sup> ***                | [5.4×10 <sup>+0</sup> , 1.4×10 <sup>+1</sup> ]   | 5.7×10 <sup>+0</sup> †                  | [1.5×10 <sup>+0</sup> , 1.0×10 <sup>+1</sup> ]   |
| Vitamin C intake (mg/d)                 | 1.4×10 <sup>-1</sup>                    | [1.7×10 <sup>-2</sup> , 2.6×10 <sup>-1</sup> ]   | 1.1×10 <sup>-1</sup>                    | [-3.9×10 <sup>-2</sup> , 2.6×10 <sup>-1</sup> ]  | 1.5×10 <sup>-1</sup>                    | [-1.9×10 <sup>-3</sup> , 3.0×10 <sup>-1</sup> ]  | 1.1×10 <sup>-1</sup>                    | [-3.4×10 <sup>-2</sup> , 2.6×10 <sup>-1</sup> ]  |
| Vitamin C intake <sup>2</sup> (mg/d)    | -7.1×10 <sup>-3</sup>                   | [-1.4×10 <sup>-2</sup> , -4.0×10 <sup>-4</sup> ] | -8.0×10 <sup>-3</sup>                   | [-1.5×10 <sup>-2</sup> , -1.3×10 <sup>-3</sup> ] | -8.6×10 <sup>-3</sup>                   | [-1.7×10 <sup>-2</sup> , -3.2×10 <sup>-4</sup> ] | -5.1×10 <sup>-3</sup>                   | [-1.3×10 <sup>-2</sup> , 3.4×10 <sup>-3</sup> ]  |
| Use of supplements <sup>c</sup>         | 3.7×10 <sup>+0</sup> ***                | [2.6×10 <sup>+0</sup> , 4.7×10 <sup>+0</sup> ]   | 3.7×10 <sup>+0</sup> ***                | [2.6×10 <sup>+0</sup> , 4.7×10 <sup>+0</sup> ]   |                                         |                                                  | 3.9×10 <sup>+0</sup> ***                | [2.7×10 <sup>+0</sup> , 5.1×10 <sup>+0</sup> ]   |
| Use of lipid-modifying drugs            | 3.1×10 <sup>-1</sup>                    | [-1.2×10 <sup>+0</sup> , 1.8×10 <sup>+0</sup> ]  | 2.3×10 <sup>-1</sup>                    | [-1.3×10 <sup>+0</sup> , 1.7×10 <sup>+0</sup> ]  | -6.1×10 <sup>-1</sup>                   | [-2.4×10 <sup>+0</sup> , 1.2×10 <sup>+0</sup> ]  | 5.6×10 <sup>-1</sup>                    | [-1.1×10 <sup>+0</sup> , 2.2×10 <sup>+0</sup> ]  |
| Plasma TOC (μmol/L)                     | 1.5×10 <sup>-1</sup> ***                | [9.7×10 <sup>-2</sup> , 1.9×10 <sup>-1</sup> ]   | 1.4×10 <sup>-1</sup> ***                | [8.8×10 <sup>-2</sup> , 2.0×10 <sup>-1</sup> ]   | 2.1×10 <sup>-1</sup> ***                | [1.4×10 <sup>-1</sup> , 2.8×10 <sup>-1</sup> ]   | 2.0×10 <sup>-1</sup> ***                | [1.4×10 <sup>-1</sup> , 2.7×10 <sup>-1</sup> ]   |
| Disease diagnosis <sup>d</sup>          | -1.0×10 <sup>+0</sup>                   | [-3.7×10 <sup>+0</sup> , 1.6×10 <sup>+0</sup> ]  | -8.1×10 <sup>-1</sup>                   | [-3.4×10 <sup>+0</sup> , 1.8×10 <sup>+0</sup> ]  | -2.2×10 <sup>+0</sup>                   | [-4.9×10 <sup>+0</sup> , 6.1×10 <sup>-1</sup> ]  | -1.5×10 <sup>+0</sup>                   | [-4.8×10 <sup>+0</sup> , 1.9×10 <sup>+0</sup> ]  |
| I (male sex : age)                      |                                         |                                                  | -1.8×10 <sup>-2</sup>                   | [-2.4×10 <sup>-1</sup> , 2.1×10 <sup>-1</sup> ]  |                                         |                                                  |                                         |                                                  |
| I (male sex : FFM)                      |                                         |                                                  | 6.0×10 <sup>-1</sup>                    | [1.5×10 <sup>-1</sup> , 1.1×10 <sup>+0</sup> ]   |                                         |                                                  |                                         |                                                  |
| I (male sex : VC intake)                |                                         |                                                  | -7.6×10 <sup>-2</sup>                   | [-2.7×10 <sup>-1</sup> , 1.2×10 <sup>-1</sup> ]  |                                         |                                                  |                                         |                                                  |
| I (age : VC intake)                     |                                         |                                                  | 1.1×10 <sup>-2</sup>                    | [-5.1×10 <sup>-4</sup> , 2.2×10 <sup>-2</sup> ]  |                                         |                                                  |                                         |                                                  |
| I (smoking : VC intake)                 |                                         |                                                  | 1.5×10 <sup>-1</sup>                    | [-3.0×10 <sup>-2</sup> , 3.3×10 <sup>-1</sup> ]  |                                         |                                                  |                                         |                                                  |
| I (male sex : plasma TOC)               |                                         |                                                  | 4.7×10 <sup>-2</sup>                    | [-6.6×10 <sup>-2</sup> , 1.6×10 <sup>-1</sup> ]  |                                         |                                                  |                                         |                                                  |
| I (age : plasma TOC)                    |                                         |                                                  | 1.1×10 <sup>-3</sup>                    | [-5.7×10 <sup>-3</sup> , 8.0×10 <sup>-3</sup> ]  |                                         |                                                  |                                         |                                                  |
| R <sup>2</sup> , marginal / conditional | 0.125 / 0.686                           |                                                  | 0.134 / 0.685                           |                                                  | 0.131 / 0.658                           |                                                  | 0.139 / 0.681                           |                                                  |

CE, coefficient estimate; 95% CI, 95% confidence interval; FFM, fat-free mass; PAI, physical activity index; VC, vitamin C; I (a : b) denotes the interaction effect for a and b. <sup>a</sup> Results are presented as coefficient estimates and 95% confidence intervals; <sup>b</sup> *P* values after adjusting for multiple testing; † *p* < 0.10; \* *p* < 0.05; \*\* *p* < 0.01; \*\*\* *p* < 0.001; <sup>c</sup> This parameter comprised the use of vitamin C and/or multivitamin supplements; <sup>d</sup> This variable combined the information on the presence of gall bladder/pancreas/chronic liver/inflammatory bowel disease and dyslipidemia.

**Supplementary Table 2.** Results of linear mixed-effects models for determinants of log plasma  $\alpha$ -tocopherol concentrations including serum cholesterol <sup>a, b</sup>.

|                                         | Model 2 (n = 399)        |                                                  | Model 3 (n = 399)        |                                                  | Model 4 (n = 289)        |                                                  | Model 5 (n = 226)        |                                                  |
|-----------------------------------------|--------------------------|--------------------------------------------------|--------------------------|--------------------------------------------------|--------------------------|--------------------------------------------------|--------------------------|--------------------------------------------------|
|                                         | CE                       | [95% CI]                                         | CE                       | [95% CI]                                         | CE                       | [95% CI]                                         | CE                       | [95% CI]                                         |
| Intercept                               | 3.5×10 <sup>+0</sup> *** | [3.5×10 <sup>+0</sup> , 3.6×10 <sup>+0</sup> ]   | 3.5×10 <sup>+0</sup> *** | [3.5×10 <sup>+0</sup> , 3.5×10 <sup>+0</sup> ]   | 3.5×10 <sup>+0</sup> *** | [3.5×10 <sup>+0</sup> , 3.5×10 <sup>+0</sup> ]   | 3.5×10 <sup>+0</sup> *** | [3.5×10 <sup>+0</sup> , 3.6×10 <sup>+0</sup> ]   |
| Age (years)                             | 7.9×10 <sup>-3</sup> *** | [6.3×10 <sup>-3</sup> , 9.4×10 <sup>-3</sup> ]   | 8.6×10 <sup>-3</sup> *** | [6.7×10 <sup>-3</sup> , 1.0×10 <sup>-2</sup> ]   | 8.0×10 <sup>-3</sup> *** | [6.4×10 <sup>-3</sup> , 9.5×10 <sup>-3</sup> ]   | 9.1×10 <sup>-3</sup> *** | [7.4×10 <sup>-3</sup> , 1.1×10 <sup>-2</sup> ]   |
| Age <sup>2</sup> (years)                | -1.5×10 <sup>-4</sup>    | [-3.0×10 <sup>-4</sup> , -3.1×10 <sup>-6</sup> ] | -1.3×10 <sup>-4</sup>    | [-2.8×10 <sup>-4</sup> , 2.1×10 <sup>-5</sup> ]  | -1.8×10 <sup>-4</sup>    | [-3.3×10 <sup>-4</sup> , -2.4×10 <sup>-5</sup> ] | -1.8×10 <sup>-4</sup>    | [-3.4×10 <sup>-4</sup> , -1.9×10 <sup>-5</sup> ] |
| Male sex                                | -5.5×10 <sup>-2</sup>    | [-1.0×10 <sup>-1</sup> , -9.3×10 <sup>-3</sup> ] | -5.2×10 <sup>-2</sup>    | [-9.9×10 <sup>-2</sup> , -5.6×10 <sup>-3</sup> ] | -5.0×10 <sup>-2</sup>    | [-9.5×10 <sup>-2</sup> , -5.2×10 <sup>-3</sup> ] | -8.4×10 <sup>-2</sup> *  | [-1.4×10 <sup>-1</sup> , -2.9×10 <sup>-2</sup> ] |
| FM (kg)                                 | 1.3×10 <sup>-3</sup>     | [-4.6×10 <sup>-4</sup> , 3.1×10 <sup>-3</sup> ]  | 1.7×10 <sup>-3</sup>     | [-3.1×10 <sup>-4</sup> , 3.8×10 <sup>-3</sup> ]  | 3.5×10 <sup>-4</sup>     | [-1.5×10 <sup>-3</sup> , 2.2×10 <sup>-3</sup> ]  | 2.0×10 <sup>-4</sup>     | [-1.9×10 <sup>-3</sup> , 2.3×10 <sup>-3</sup> ]  |
| Current/past smoking                    | 2.2×10 <sup>-2</sup>     | [-1.9×10 <sup>-2</sup> , 6.3×10 <sup>-2</sup> ]  | 2.4×10 <sup>-2</sup>     | [-1.7×10 <sup>-2</sup> , 6.4×10 <sup>-2</sup> ]  | 1.2×10 <sup>-2</sup>     | [-2.8×10 <sup>-2</sup> , 5.2×10 <sup>-2</sup> ]  | 2.7×10 <sup>-2</sup>     | [-2.2×10 <sup>-2</sup> , 7.7×10 <sup>-2</sup> ]  |
| PAI                                     | 2.7×10 <sup>-2</sup>     | [-2.9×10 <sup>-2</sup> , 8.3×10 <sup>-2</sup> ]  | 2.8×10 <sup>-2</sup>     | [-2.8×10 <sup>-2</sup> , 8.4×10 <sup>-2</sup> ]  | 1.4×10 <sup>-2</sup>     | [-4.3×10 <sup>-2</sup> , 7.3×10 <sup>-2</sup> ]  | 8.4×10 <sup>-2</sup>     | [2.0×10 <sup>-2</sup> , 1.5×10 <sup>-1</sup> ]   |
| TOC intake (mg/d)                       | 2.1×10 <sup>-3</sup>     | [1.6×10 <sup>-4</sup> , 4.0×10 <sup>-3</sup> ]   | 3.2×10 <sup>-3</sup>     | [8.8×10 <sup>-4</sup> , 5.6×10 <sup>-3</sup> ]   | 3.3×10 <sup>-4</sup>     | [-1.7×10 <sup>-3</sup> , 2.4×10 <sup>-3</sup> ]  | 2.5×10 <sup>-3</sup>     | [2.6×10 <sup>-4</sup> , 4.7×10 <sup>-3</sup> ]   |
| TOC intake <sup>2</sup> (mg/d)          | -5.8×10 <sup>-5</sup>    | [-2.0×10 <sup>-4</sup> , 8.3×10 <sup>-5</sup> ]  | -3.7×10 <sup>-5</sup>    | [-1.8×10 <sup>-4</sup> , 1.1×10 <sup>-4</sup> ]  | -5.4×10 <sup>-6</sup>    | [-1.4×10 <sup>-4</sup> , 1.3×10 <sup>-4</sup> ]  | -1.2×10 <sup>-4</sup>    | [-2.8×10 <sup>-4</sup> , 4.9×10 <sup>-5</sup> ]  |
| Use of supplements <sup>c</sup>         | 1.2×10 <sup>-1</sup> *** | [1.0×10 <sup>-1</sup> , 1.4×10 <sup>-1</sup> ]   | 1.2×10 <sup>-1</sup> *** | [1.0×10 <sup>-1</sup> , 1.4×10 <sup>-1</sup> ]   |                          |                                                  | 1.1×10 <sup>-1</sup> *** | [8.7×10 <sup>-2</sup> , 1.3×10 <sup>-1</sup> ]   |
| Use of lipid-modifying drugs            | 1.7×10 <sup>-2</sup>     | [-6.2×10 <sup>-3</sup> , 4.0×10 <sup>-2</sup> ]  | 1.7×10 <sup>-2</sup>     | [-5.7×10 <sup>-3</sup> , 4.1×10 <sup>-2</sup> ]  | 3.8×10 <sup>-2</sup> *   | [1.4×10 <sup>-2</sup> , 6.3×10 <sup>-2</sup> ]   | 1.5×10 <sup>-2</sup>     | [-1.0×10 <sup>-2</sup> , 4.1×10 <sup>-2</sup> ]  |
| Plasma vitamin C (μmol/L)               | 1.4×10 <sup>-3</sup> *** | [9.7×10 <sup>-4</sup> , 1.9×10 <sup>-3</sup> ]   | 1.4×10 <sup>-3</sup> *** | [8.3×10 <sup>-4</sup> , 2.0×10 <sup>-3</sup> ]   | 1.5×10 <sup>-3</sup> *** | [1.0×10 <sup>-3</sup> , 2.0×10 <sup>-3</sup> ]   | 1.7×10 <sup>-3</sup> *** | [1.2×10 <sup>-3</sup> , 2.3×10 <sup>-3</sup> ]   |
| Disease diagnosis <sup>d</sup>          | 6.5×10 <sup>-2</sup> *   | [2.6×10 <sup>-2</sup> , 1.0×10 <sup>-1</sup> ]   | 6.5×10 <sup>-2</sup> *   | [2.6×10 <sup>-2</sup> , 1.0×10 <sup>-1</sup> ]   | 2.9×10 <sup>-2</sup>     | [-8.1×10 <sup>-3</sup> , 6.6×10 <sup>-2</sup> ]  | 5.4×10 <sup>-2</sup>     | [6.0×10 <sup>-3</sup> , 1.0×10 <sup>-1</sup> ]   |
| Serum cholesterol (mmol/L)              | 1.0×10 <sup>-1</sup> *** | [9.3×10 <sup>-2</sup> , 1.1×10 <sup>-1</sup> ]   | 1.0×10 <sup>-1</sup> *** | [9.3×10 <sup>-2</sup> , 1.1×10 <sup>-1</sup> ]   | 1.0×10 <sup>-1</sup> *** | [9.3×10 <sup>-2</sup> , 1.1×10 <sup>-1</sup> ]   | 9.9×10 <sup>-2</sup> *** | [8.9×10 <sup>-2</sup> , 1.1×10 <sup>-1</sup> ]   |
| I (male sex : age)                      |                          |                                                  | -2.0×10 <sup>-3</sup>    | [-5.2×10 <sup>-3</sup> , 1.2×10 <sup>-3</sup> ]  |                          |                                                  |                          |                                                  |
| I (male sex : FM)                       |                          |                                                  | -1.5×10 <sup>-3</sup>    | [-5.6×10 <sup>-3</sup> , 2.4×10 <sup>-3</sup> ]  |                          |                                                  |                          |                                                  |
| I (male sex : TOC intake)               |                          |                                                  | -1.4×10 <sup>-3</sup>    | [-5.0×10 <sup>-3</sup> , 2.2×10 <sup>-3</sup> ]  |                          |                                                  |                          |                                                  |
| I (age : TOC intake)                    |                          |                                                  | -7.3×10 <sup>-5</sup>    | [-2.7×10 <sup>-4</sup> , 1.2×10 <sup>-4</sup> ]  |                          |                                                  |                          |                                                  |
| I (smoking : TOC intake)                |                          |                                                  | -1.7×10 <sup>-3</sup>    | [-5.1×10 <sup>-3</sup> , 1.6×10 <sup>-3</sup> ]  |                          |                                                  |                          |                                                  |
| I (male sex : plasma vitamin C)         |                          |                                                  | 2.6×10 <sup>-4</sup>     | [-7.5×10 <sup>-4</sup> , 1.3×10 <sup>-3</sup> ]  |                          |                                                  |                          |                                                  |
| I (age : plasma vitamin C)              |                          |                                                  | -2.5×10 <sup>-5</sup>    | [-8.6×10 <sup>-5</sup> , 3.7×10 <sup>-5</sup> ]  |                          |                                                  |                          |                                                  |
| R <sup>2</sup> , marginal / conditional | 0.302 / 0.719            |                                                  | 0.302 / 0.718            |                                                  | 0.312 / 0.724            |                                                  | 0.342 / 0.734            |                                                  |

CE, coefficient estimate; 95% CI, 95% confidence interval; FM, fat mass; PAI, physical activity index; TOC,  $\alpha$ -tocopherol equivalents; I (a : b) denotes the interaction effect for a and b. <sup>a</sup> Results are presented as coefficient estimates and 95% confidence intervals; <sup>b</sup> P values after adjusting for multiple testing; \*  $p < 0.05$ ; \*\*\*  $p < 0.001$ ; <sup>c</sup> This parameter comprised the use of vitamin E and/or multivitamin supplements; <sup>d</sup> This variable combined the information on the presence of gall bladder/pancreas/chronic liver/inflammatory bowel disease and dyslipidemia.

**Supplementary Table 3.** Results of linear mixed-effects models for determinants of log plasma  $\alpha$ -tocopherol concentrations after excluding model-specific outliers <sup>a, b</sup>.

|                                         | Model 2 ( <i>n</i> = 392, 2743 records) |                                                  | Model 3 ( <i>n</i> = 392, 2746 records) |                                                  | Model 4 ( <i>n</i> = 283, 1749 records) |                                                  | Model 5 ( <i>n</i> = 226, 1986 records) |                                                  |
|-----------------------------------------|-----------------------------------------|--------------------------------------------------|-----------------------------------------|--------------------------------------------------|-----------------------------------------|--------------------------------------------------|-----------------------------------------|--------------------------------------------------|
|                                         | CE                                      | [95% CI]                                         | CE                                      | [95% CI]                                         | CE                                      | [95% CI]                                         | CE                                      | [95% CI]                                         |
| Intercept                               | 3.5×10 <sup>0</sup> ***                 | [3.5×10 <sup>0</sup> , 3.6×10 <sup>0</sup> ]     | 3.5×10 <sup>0</sup> ***                 | [3.5×10 <sup>0</sup> , 3.6×10 <sup>0</sup> ]     | 3.5×10 <sup>0</sup> ***                 | [3.5×10 <sup>0</sup> , 3.5×10 <sup>0</sup> ]     | 3.5×10 <sup>0</sup> ***                 | [3.5×10 <sup>0</sup> , 3.6×10 <sup>0</sup> ]     |
| Age (years)                             | 4.4×10 <sup>-3</sup> ***                | [2.7×10 <sup>-3</sup> , 6.0×10 <sup>-3</sup> ]   | 5.5×10 <sup>-3</sup> ***                | [3.6×10 <sup>-3</sup> , 7.5×10 <sup>-3</sup> ]   | 5.1×10 <sup>-3</sup> ***                | [3.5×10 <sup>-3</sup> , 6.7×10 <sup>-3</sup> ]   | 5.7×10 <sup>-3</sup> ***                | [3.9×10 <sup>-3</sup> , 7.4×10 <sup>-3</sup> ]   |
| Age <sup>2</sup> (years)                | -1.4×10 <sup>-4</sup>                   | [-2.9×10 <sup>-4</sup> , 4.2×10 <sup>-7</sup> ]  | -1.2×10 <sup>-4</sup>                   | [-2.6×10 <sup>-4</sup> , 3.1×10 <sup>-5</sup> ]  | -1.6×10 <sup>-4</sup>                   | [-3.2×10 <sup>-4</sup> , -1.2×10 <sup>-5</sup> ] | -1.3×10 <sup>-4</sup>                   | [-2.8×10 <sup>-4</sup> , 2.1×10 <sup>-5</sup> ]  |
| Male sex                                | -1.1×10 <sup>-1</sup> ***               | [-1.7×10 <sup>-1</sup> , -6.1×10 <sup>-2</sup> ] | -1.1×10 <sup>-1</sup> **                | [-1.6×10 <sup>-1</sup> , -5.3×10 <sup>-2</sup> ] | -1.1×10 <sup>-1</sup> ***               | [-1.6×10 <sup>-1</sup> , -5.8×10 <sup>-2</sup> ] | -1.5×10 <sup>-1</sup> ***               | [-2.2×10 <sup>-1</sup> , -8.3×10 <sup>-2</sup> ] |
| FM (kg)                                 | 2.9×10 <sup>-4</sup>                    | [-1.6×10 <sup>-3</sup> , 2.1×10 <sup>-3</sup> ]  | 4.7×10 <sup>-4</sup>                    | [-1.7×10 <sup>-3</sup> , 2.6×10 <sup>-3</sup> ]  | 4.1×10 <sup>-4</sup>                    | [-1.6×10 <sup>-3</sup> , 2.4×10 <sup>-3</sup> ]  | 2.7×10 <sup>-4</sup>                    | [-2.0×10 <sup>-3</sup> , 2.5×10 <sup>-3</sup> ]  |
| Current/past smoking                    | 3.9×10 <sup>-2</sup>                    | [-7.9×10 <sup>-3</sup> , 8.7×10 <sup>-2</sup> ]  | 4.1×10 <sup>-2</sup>                    | [-6.4×10 <sup>-3</sup> , 8.8×10 <sup>-2</sup> ]  | 3.0×10 <sup>-2</sup>                    | [-1.8×10 <sup>-2</sup> , 7.7×10 <sup>-2</sup> ]  | 5.0×10 <sup>-2</sup>                    | [-9.2×10 <sup>-3</sup> , 1.1×10 <sup>-1</sup> ]  |
| PAI                                     | 1.9×10 <sup>-2</sup>                    | [-3.2×10 <sup>-2</sup> , 6.9×10 <sup>-2</sup> ]  | 1.9×10 <sup>-2</sup>                    | [-3.2×10 <sup>-2</sup> , 6.9×10 <sup>-2</sup> ]  | 4.5×10 <sup>-3</sup>                    | [-5.0×10 <sup>-2</sup> , 5.9×10 <sup>-2</sup> ]  | 7.6×10 <sup>-2</sup>                    | [1.8×10 <sup>-2</sup> , 1.3×10 <sup>-1</sup> ]   |
| TOC intake (mg/d)                       | 7.3×10 <sup>-4</sup>                    | [-1.0×10 <sup>-3</sup> , 2.5×10 <sup>-3</sup> ]  | 1.1×10 <sup>-3</sup>                    | [-1.1×10 <sup>-3</sup> , 3.2×10 <sup>-3</sup> ]  | 3.6×10 <sup>-5</sup>                    | [-1.8×10 <sup>-3</sup> , 1.9×10 <sup>-3</sup> ]  | 7.0×10 <sup>-4</sup>                    | [-1.3×10 <sup>-3</sup> , 2.7×10 <sup>-3</sup> ]  |
| TOC intake <sup>2</sup> (mg/d)          | -2.7×10 <sup>-5</sup>                   | [-1.5×10 <sup>-4</sup> , 9.8×10 <sup>-5</sup> ]  | 3.4×10 <sup>-7</sup>                    | [-1.3×10 <sup>-4</sup> , 1.3×10 <sup>-4</sup> ]  | 3.0×10 <sup>-5</sup>                    | [-9.9×10 <sup>-5</sup> , 1.6×10 <sup>-4</sup> ]  | -2.6×10 <sup>-5</sup>                   | [-1.8×10 <sup>-4</sup> , 1.2×10 <sup>-4</sup> ]  |
| Use of supplements <sup>c</sup>         | 9.6×10 <sup>-2</sup> ***                | [8.0×10 <sup>-2</sup> , 1.1×10 <sup>-1</sup> ]   | 9.6×10 <sup>-2</sup> ***                | [8.0×10 <sup>-2</sup> , 1.1×10 <sup>-1</sup> ]   |                                         |                                                  | 9.3×10 <sup>-2</sup> ***                | [7.5×10 <sup>-2</sup> , 1.1×10 <sup>-1</sup> ]   |
| Use of lipid-modifying drugs            | -5.6×10 <sup>-2</sup> ***               | [-7.7×10 <sup>-2</sup> , -3.5×10 <sup>-2</sup> ] | -5.6×10 <sup>-2</sup> ***               | [-7.6×10 <sup>-2</sup> , -3.5×10 <sup>-2</sup> ] | -4.2×10 <sup>-2</sup> **                | [-6.4×10 <sup>-2</sup> , -1.8×10 <sup>-2</sup> ] | -6.6×10 <sup>-2</sup> ***               | [-8.9×10 <sup>-2</sup> , -4.3×10 <sup>-2</sup> ] |
| Plasma vitamin C (μmol/L)               | 1.6×10 <sup>-3</sup> ***                | [1.2×10 <sup>-3</sup> , 2.1×10 <sup>-3</sup> ]   | 1.5×10 <sup>-3</sup> ***                | [9.9×10 <sup>-4</sup> , 2.0×10 <sup>-3</sup> ]   | 1.4×10 <sup>-3</sup> ***                | [9.5×10 <sup>-4</sup> , 1.9×10 <sup>-3</sup> ]   | 1.8×10 <sup>-3</sup> ***                | [1.3×10 <sup>-3</sup> , 2.3×10 <sup>-3</sup> ]   |
| Disease diagnosis <sup>d</sup>          | 1.1×10 <sup>-1</sup> ***                | [6.7×10 <sup>-2</sup> , 1.6×10 <sup>-1</sup> ]   | 1.1×10 <sup>-1</sup> ***                | [6.8×10 <sup>-2</sup> , 1.6×10 <sup>-1</sup> ]   | 8.1×10 <sup>-2</sup> **                 | [3.6×10 <sup>-2</sup> , 1.2×10 <sup>-1</sup> ]   | 8.9×10 <sup>-2</sup> *                  | [3.1×10 <sup>-2</sup> , 1.5×10 <sup>-1</sup> ]   |
| I (male sex : age)                      |                                         |                                                  | -3.0×10 <sup>-3</sup>                   | [-6.4×10 <sup>-3</sup> , 3.7×10 <sup>-4</sup> ]  |                                         |                                                  |                                         |                                                  |
| I (male sex : FM)                       |                                         |                                                  | -1.9×10 <sup>-4</sup>                   | [-4.4×10 <sup>-3</sup> , 3.9×10 <sup>-3</sup> ]  |                                         |                                                  |                                         |                                                  |
| I (male sex : TOC intake)               |                                         |                                                  | 2.9×10 <sup>-4</sup>                    | [-2.9×10 <sup>-3</sup> , 3.5×10 <sup>-3</sup> ]  |                                         |                                                  |                                         |                                                  |
| I (age : TOC intake)                    |                                         |                                                  | -1.3×10 <sup>-4</sup>                   | [-3.1×10 <sup>-4</sup> , 5.4×10 <sup>-5</sup> ]  |                                         |                                                  |                                         |                                                  |
| I (smoking : TOC intake)                |                                         |                                                  | -1.3×10 <sup>-3</sup>                   | [-4.4×10 <sup>-3</sup> , 1.7×10 <sup>-3</sup> ]  |                                         |                                                  |                                         |                                                  |
| I (male sex : plasma vitamin C)         |                                         |                                                  | 7.2×10 <sup>-4</sup>                    | [-2.2×10 <sup>-4</sup> , 1.6×10 <sup>-3</sup> ]  |                                         |                                                  |                                         |                                                  |
| I (age : plasma vitamin C)              |                                         |                                                  | -8.1×10 <sup>-5</sup>                   | [-1.4×10 <sup>-4</sup> , -2.1×10 <sup>-5</sup> ] |                                         |                                                  |                                         |                                                  |
| R <sup>2</sup> , marginal / conditional | 0.148 / 0.784                           |                                                  | 0.150 / 0.783                           |                                                  | 0.127 / 0.777                           |                                                  | 0.179 / 0.798                           |                                                  |

CE, coefficient estimate; 95% CI, 95% confidence interval; FM, fat mass; PAI, physical activity index; TOC,  $\alpha$ -tocopherol equivalents; I (a : b) denotes the interaction effect for a and b. <sup>a</sup> Data are presented as coefficient estimates and 95% confidence intervals; <sup>b</sup> *P* values after adjusting for multiple testing: \* *p* < 0.05; \*\* *p* < 0.01; \*\*\* *p* < 0.001; <sup>c</sup> This parameter comprised the use of vitamin E and/or multivitamin supplements; <sup>d</sup> This variable combined the information on reported diagnoses of gall bladder/pancreas/chronic liver/inflammatory bowel disease and dyslipidemia.

**Supplementary Table 4.** Results of linear mixed-effects models for determinants of the log  $\alpha$ -tocopherol/total cholesterol ratio after excluding model-specific outliers <sup>a, b</sup>.

|                                         | Model 2 ( <i>n</i> = 393, 2748 records) |                                                  | Model 3 ( <i>n</i> = 394, 2751 records) |                                                  | Model 4 ( <i>n</i> = 285, 1760 records) |                                                  | Model 5 ( <i>n</i> = 226, 1982 records) |                                                  |
|-----------------------------------------|-----------------------------------------|--------------------------------------------------|-----------------------------------------|--------------------------------------------------|-----------------------------------------|--------------------------------------------------|-----------------------------------------|--------------------------------------------------|
|                                         | CE                                      | [95% CI]                                         | CE                                      | 95% CI                                           | CE                                      | [95% CI]                                         | CE                                      | [95% CI]                                         |
| Intercept                               | 1.8×10 <sup>+0</sup> ***                | [1.8×10 <sup>+0</sup> , 1.8×10 <sup>+0</sup> ]   | 1.8×10 <sup>+0</sup> ***                | [1.8×10 <sup>+0</sup> , 1.8×10 <sup>+0</sup> ]   | 1.8×10 <sup>+0</sup> ***                | [1.8×10 <sup>+0</sup> , 1.8×10 <sup>+0</sup> ]   | 1.8×10 <sup>+0</sup> ***                | [1.8×10 <sup>+0</sup> , 1.9×10 <sup>+0</sup> ]   |
| Age (years)                             | 9.5×10 <sup>-3</sup> ***                | [8.1×10 <sup>-3</sup> , 1.1×10 <sup>-2</sup> ]   | 9.9×10 <sup>-3</sup> ***                | [8.2×10 <sup>-3</sup> , 1.2×10 <sup>-2</sup> ]   | 9.7×10 <sup>-3</sup> ***                | [8.3×10 <sup>-3</sup> , 1.1×10 <sup>-2</sup> ]   | 1.1×10 <sup>-2</sup> ***                | [9.5×10 <sup>-3</sup> , 1.2×10 <sup>-2</sup> ]   |
| Age <sup>2</sup> (years)                | -1.7×10 <sup>-4</sup> †                 | [-3.1×10 <sup>-4</sup> , -4.0×10 <sup>-5</sup> ] | -1.6×10 <sup>-4</sup>                   | [-3.0×10 <sup>-4</sup> , -2.5×10 <sup>-5</sup> ] | -1.7×10 <sup>-4</sup>                   | [-3.1×10 <sup>-4</sup> , -3.4×10 <sup>-5</sup> ] | -1.6×10 <sup>-4</sup>                   | [-3.0×10 <sup>-4</sup> , -2.0×10 <sup>-5</sup> ] |
| Male sex                                | -8.0×10 <sup>-3</sup>                   | [-5.1×10 <sup>-2</sup> , 3.5×10 <sup>-2</sup> ]  | -5.4×10 <sup>-3</sup>                   | [-4.9×10 <sup>-2</sup> , 3.8×10 <sup>-2</sup> ]  | 1.6×10 <sup>-5</sup>                    | [-4.3×10 <sup>-2</sup> , 4.3×10 <sup>-2</sup> ]  | -2.7×10 <sup>-2</sup>                   | [-8.0×10 <sup>-2</sup> , 2.6×10 <sup>-2</sup> ]  |
| FM (kg)                                 | 1.2×10 <sup>-3</sup>                    | [-4.2×10 <sup>-4</sup> , 2.8×10 <sup>-3</sup> ]  | 1.7×10 <sup>-3</sup>                    | [-1.6×10 <sup>-4</sup> , 3.6×10 <sup>-3</sup> ]  | 6.6×10 <sup>-4</sup>                    | [-1.0×10 <sup>-3</sup> , 2.4×10 <sup>-3</sup> ]  | 6.1×10 <sup>-4</sup>                    | [-1.3×10 <sup>-3</sup> , 2.6×10 <sup>-3</sup> ]  |
| Current/past smoking                    | 3.8×10 <sup>-3</sup>                    | [-3.5×10 <sup>-2</sup> , 4.2×10 <sup>-2</sup> ]  | 5.5×10 <sup>-3</sup>                    | [-3.3×10 <sup>-2</sup> , 4.4×10 <sup>-2</sup> ]  | -3.8×10 <sup>-3</sup>                   | [-4.3×10 <sup>-2</sup> , 3.5×10 <sup>-2</sup> ]  | 1.3×10 <sup>-2</sup>                    | [-3.5×10 <sup>-2</sup> , 6.0×10 <sup>-2</sup> ]  |
| PAI                                     | -2.5×10 <sup>-3</sup>                   | [-5.1×10 <sup>-2</sup> , 4.6×10 <sup>-2</sup> ]  | -2.4×10 <sup>-3</sup>                   | [-5.1×10 <sup>-2</sup> , 4.6×10 <sup>-2</sup> ]  | -6.8×10 <sup>-3</sup>                   | [-6.0×10 <sup>-2</sup> , 4.6×10 <sup>-2</sup> ]  | 5.2×10 <sup>-2</sup>                    | [-3.6×10 <sup>-3</sup> , 1.1×10 <sup>-1</sup> ]  |
| TOC intake (mg/d)                       | 1.2×10 <sup>-3</sup>                    | [-5.2×10 <sup>-4</sup> , 2.9×10 <sup>-3</sup> ]  | 2.1×10 <sup>-3</sup>                    | [5.3×10 <sup>-5</sup> , 4.2×10 <sup>-3</sup> ]   | -1.4×10 <sup>-4</sup>                   | [-2.0×10 <sup>-3</sup> , 1.7×10 <sup>-3</sup> ]  | 1.8×10 <sup>-3</sup>                    | [-1.8×10 <sup>-4</sup> , 3.7×10 <sup>-3</sup> ]  |
| TOC intake <sup>2</sup> (mg/d)          | 4.2×10 <sup>-6</sup>                    | [-1.2×10 <sup>-4</sup> , 1.3×10 <sup>-4</sup> ]  | 1.2×10 <sup>-5</sup>                    | [-1.1×10 <sup>-4</sup> , 1.4×10 <sup>-4</sup> ]  | 5.1×10 <sup>-5</sup>                    | [-7.4×10 <sup>-5</sup> , 1.7×10 <sup>-4</sup> ]  | -3.8×10 <sup>-5</sup>                   | [-1.8×10 <sup>-4</sup> , 1.1×10 <sup>-4</sup> ]  |
| Use of supplements <sup>c</sup>         | 1.1×10 <sup>-1</sup> ***                | [9.4×10 <sup>-2</sup> , 1.2×10 <sup>-1</sup> ]   | 1.1×10 <sup>-1</sup> ***                | [9.5×10 <sup>-2</sup> , 1.3×10 <sup>-1</sup> ]   |                                         |                                                  | 1.0×10 <sup>-1</sup> ***                | [8.6×10 <sup>-2</sup> , 1.2×10 <sup>-1</sup> ]   |
| Use of lipid-modifying drugs            | 7.9×10 <sup>-2</sup> ***                | [5.9×10 <sup>-2</sup> , 9.9×10 <sup>-2</sup> ]   | 7.9×10 <sup>-2</sup> ***                | [6.0×10 <sup>-2</sup> , 9.9×10 <sup>-2</sup> ]   | 1.0×10 <sup>-1</sup> ***                | [7.9×10 <sup>-2</sup> , 1.2×10 <sup>-1</sup> ]   | 7.3×10 <sup>-2</sup> ***                | [5.1×10 <sup>-2</sup> , 9.5×10 <sup>-2</sup> ]   |
| Plasma vitamin C (μmol/L)               | 1.1×10 <sup>-3</sup> ***                | [6.4×10 <sup>-4</sup> , 1.5×10 <sup>-3</sup> ]   | 1.1×10 <sup>-3</sup> ***                | [5.7×10 <sup>-4</sup> , 1.6×10 <sup>-3</sup> ]   | 1.3×10 <sup>-3</sup> ***                | [8.6×10 <sup>-4</sup> , 1.8×10 <sup>-3</sup> ]   | 1.2×10 <sup>-3</sup> ***                | [6.9×10 <sup>-4</sup> , 1.6×10 <sup>-3</sup> ]   |
| Disease diagnosis <sup>d</sup>          | 2.2×10 <sup>-2</sup>                    | [-1.4×10 <sup>-2</sup> , 5.9×10 <sup>-2</sup> ]  | 2.2×10 <sup>-2</sup>                    | [-1.4×10 <sup>-2</sup> , 5.8×10 <sup>-2</sup> ]  | -2.7×10 <sup>-3</sup>                   | [-3.9×10 <sup>-2</sup> , 3.4×10 <sup>-2</sup> ]  | 2.1×10 <sup>-2</sup>                    | [-2.5×10 <sup>-2</sup> , 6.7×10 <sup>-2</sup> ]  |
| I (male sex : age)                      |                                         |                                                  | -1.1×10 <sup>-3</sup>                   | [-3.9×10 <sup>-3</sup> , 1.8×10 <sup>-3</sup> ]  |                                         |                                                  |                                         |                                                  |
| I (male sex : FM)                       |                                         |                                                  | -1.7×10 <sup>-3</sup>                   | [-5.3×10 <sup>-3</sup> , 1.9×10 <sup>-3</sup> ]  |                                         |                                                  |                                         |                                                  |
| I (male sex : TOC intake)               |                                         |                                                  | 1.4×10 <sup>-4</sup>                    | [-3.0×10 <sup>-3</sup> , 3.3×10 <sup>-3</sup> ]  |                                         |                                                  |                                         |                                                  |
| I (age : TOC intake)                    |                                         |                                                  | 7.2×10 <sup>-6</sup>                    | [-1.7×10 <sup>-4</sup> , 1.8×10 <sup>-4</sup> ]  |                                         |                                                  |                                         |                                                  |
| I (smoking : TOC intake)                |                                         |                                                  | -2.4×10 <sup>-3</sup>                   | [-5.3×10 <sup>-3</sup> , 5.5×10 <sup>-4</sup> ]  |                                         |                                                  |                                         |                                                  |
| I (male sex : plasma vitamin C)         |                                         |                                                  | 1.7×10 <sup>-4</sup>                    | [-7.2×10 <sup>-4</sup> , 1.1×10 <sup>-3</sup> ]  |                                         |                                                  |                                         |                                                  |
| I (age : plasma vitamin C)              |                                         |                                                  | -4.6×10 <sup>-5</sup>                   | [-1.0×10 <sup>-4</sup> , 9.0×10 <sup>-6</sup> ]  |                                         |                                                  |                                         |                                                  |
| R <sup>2</sup> , marginal / conditional | 0.159 / 0.709                           |                                                  | 0.160 / 0.709                           |                                                  | 0.165 / 0.704                           |                                                  | 0.190 / 0.715                           |                                                  |

CE, coefficient estimate; 95% CI, 95% confidence interval; FM, fat mass; PAI, physical activity index; TOC,  $\alpha$ -tocopherol equivalents; I (a : b) denotes the interaction effect for a and b. <sup>a</sup> Results are presented as coefficient estimates and 95% confidence intervals; <sup>b</sup> *P* values after adjusting for multiple testing; <sup>†</sup> *p* < 0.10; \*\*\* *p* < 0.001; <sup>c</sup> This parameter comprised the use of vitamin E and/or multivitamin supplements; <sup>d</sup> This variable combined the information on the presence of gall bladder/pancreas/chronic liver/inflammatory bowel disease and dyslipidemia.
